# Supplementary material for: Women’s experiences of maternity care in England: preliminary development of a standard measure
Source: Springer Nature journal article supplement (doi:10.1186/s12884-019-2284-9), 2019-05-14
Supplement: MOESM2 [file 16723380]

### Parallel Analysis Scree Plots

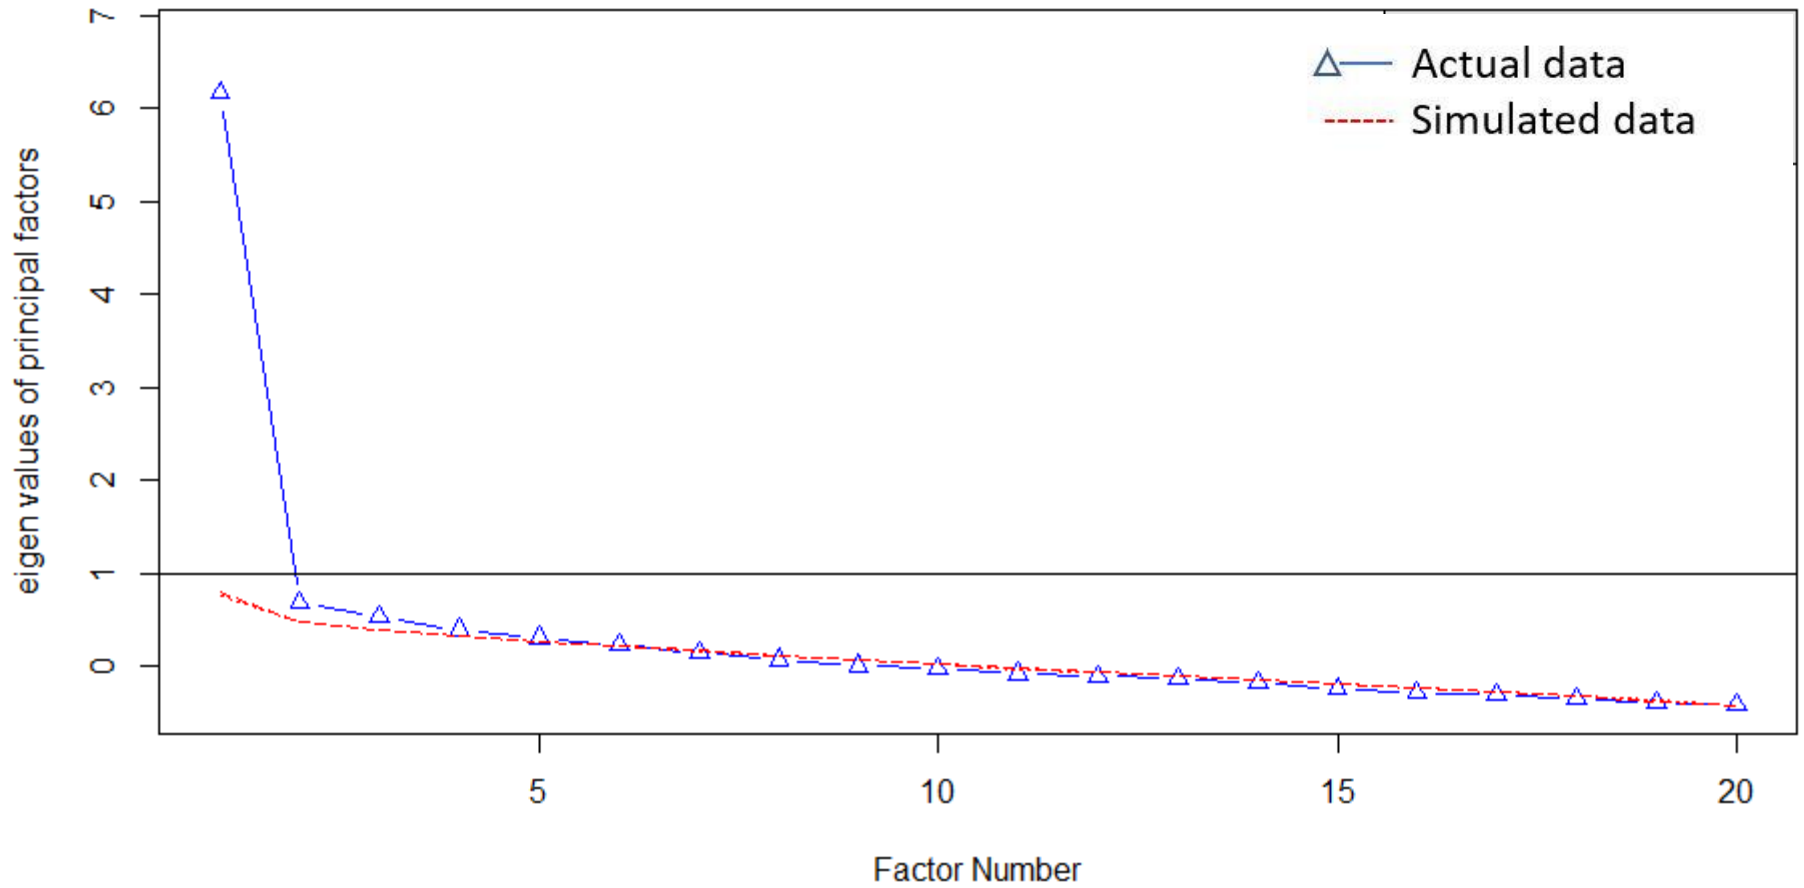

Figure 1. Scree plot following parallel analysis of the **pregnancy** scale.

### Parallel Analysis Scree Plots

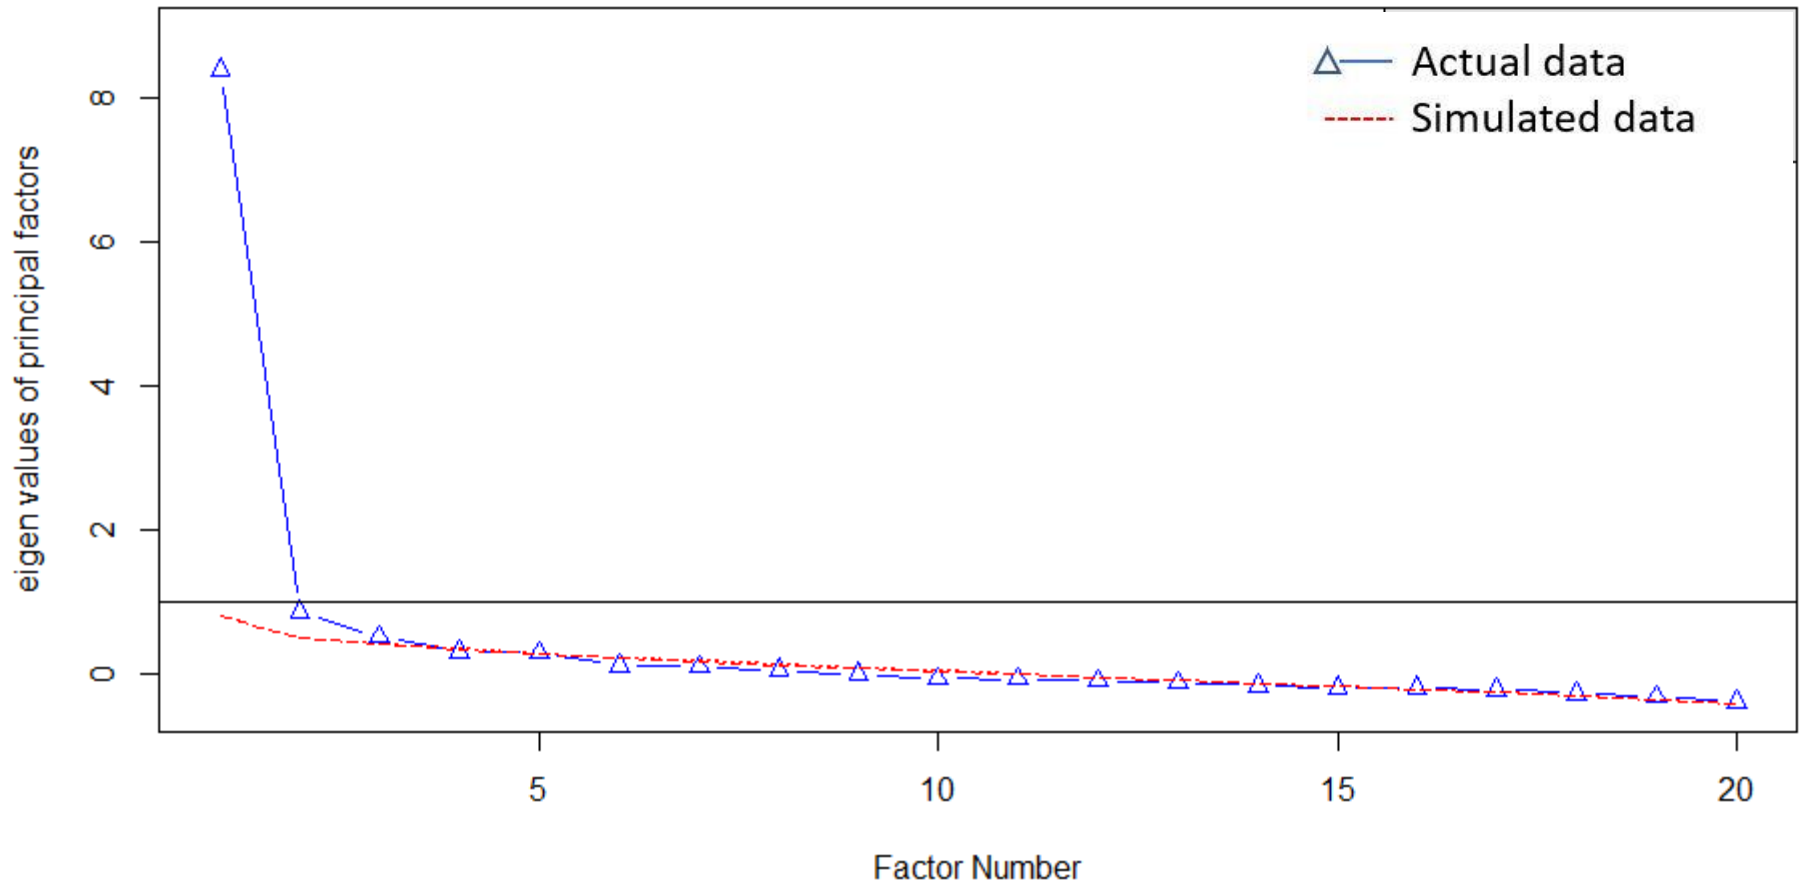

Figure 2. Scree plot following parallel analysis of the **labour and childbirth** scale.

### Parallel Analysis Scree Plots

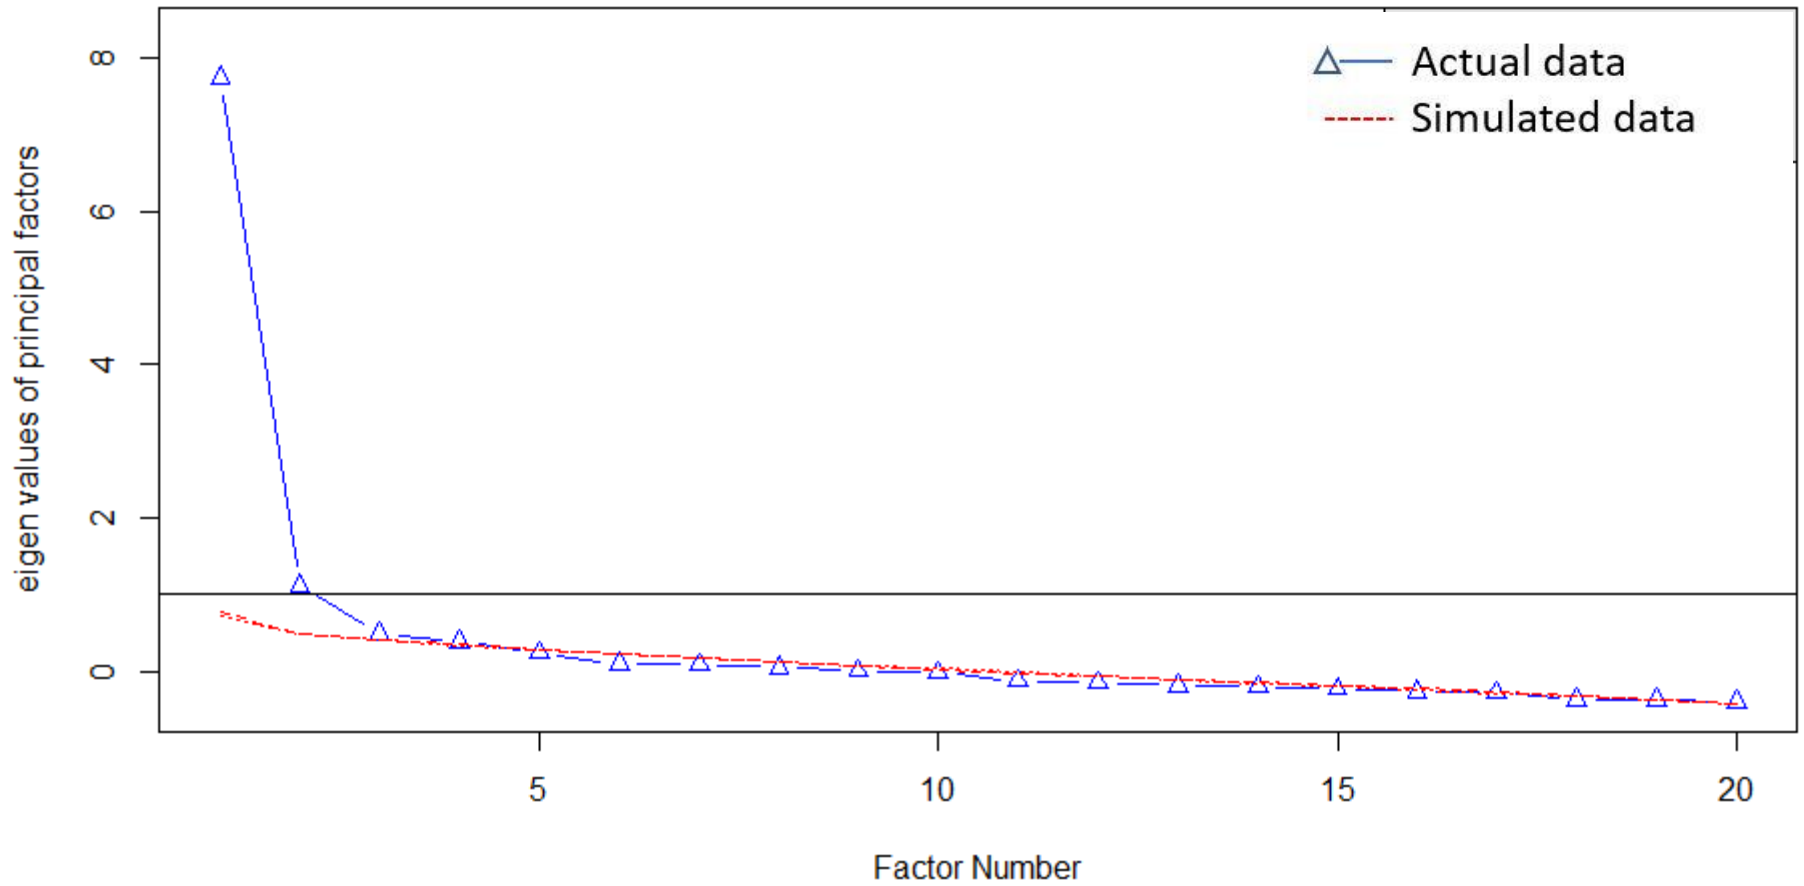

Figure 3. Scree plot following parallel analysis of the **postnatal** scale.
